# Supplementary material
Source: PubMed Central journal article supplement (PMC7001761)
Supplement: NIHMS1549161-supplement-Supplemental_Material.pdf [file NIHMS1549161-supplement-Supplemental_Material.pdf]

## **SUPPLEMENTAL MATERIAL**

### **Supplemental Methods**

Brain MRI protocol and post-processing: Imaging was performed on a dedicated 1.5-T research MRI system (Philips Medical Systems). The time-of-flight MRA was acquired with a field of view 15 cm, 1 mm effective slice thickness, acquisition matrix interpolated to  $256 \times 228$  matrix, flip angle 25 degrees, TR 20 ms and TE 2.7 ms and the FLAIR images with a multisection turbo spin-echo mode with an FOV of 250 mm, rectangular FOV of 80%, acquisition matrix of  $192 \times 133$  scaled to  $256 \times 256$  in reconstruction, 3-mm section thickness with no gap, a TE of 144 ms, a TR of 5500 ms, an inversion recovery delay of 1900 ms, and a flip angle of  $90^\circ$ . The FLAIR image was acquired in the Multi-Slice Turbo Spin Echo (MS-TSE) mode with a field of view of 250 mm, rectangular field of view of 80%, acquisition matrix of  $192 \times 133$  scaled to  $256 \times 256$  in reconstruction, 3mm-slice thickness with no gap, an echo time of 144 ms, a repetition time of 5500 ms, an inversion recovery delay of 1900 ms, and a flip angle of  $90^\circ$ .

### **Supplemental Tables:**

**Table I: Interactions**

|                                    |                             | Myocardial Infarction  | Any stroke       | Ischemic stroke | Crypto-genic stroke | Cardio-embolic stroke | Intracranial arterial disease (small and large) |
|------------------------------------|-----------------------------|------------------------|------------------|-----------------|---------------------|-----------------------|-------------------------------------------------|
|                                    |                             | Beta estimate, P-value |                  |                 |                     |                       |                                                 |
| <b>Distal cryptogenic</b>          | Years on antihypertensives  | -0.17<br>(0.11)        | -0.16<br>(0.007) | -0.17<br>(0.06) | -0.37<br>(0.02)     | -0.16<br>(0.19)       | -0.01<br>(0.99)                                 |
|                                    | Mean # of antihypertensives | -0.88<br>(0.21)        | -0.18<br>(0.60)  | -0.19<br>(0.61) | 0.22<br>(0.76)      | -0.45<br>(0.50)       | 0.53<br>(0.37)                                  |
|                                    | Years on Hypoglycemics      | -0.58<br>(0.40)        | -0.16<br>(0.08)  | -0.13<br>(0.13) | -0.52<br>(0.35)     | -14.7<br>(0.99)       | -0.10<br>(0.45)                                 |
|                                    | Years on statins            | -0.05<br>(0.67)        | -0.06<br>(0.39)  | -0.06<br>(0.42) | -0.18<br>(0.32)     | 0.04<br>(0.74)        | -0.06<br>(0.67)                                 |
|                                    | Years on antiplatelets      | -0.08<br>(0.13)        | -0.04<br>(0.50)  | -0.05<br>(0.47) | -0.35<br>(0.12)     | 0.03<br>(0.82)        | 0.05<br>(0.70)                                  |
|                                    | Years on anticoagulation    | 0.08<br>(0.88)         | -0.13<br>(0.60)  | -0.16<br>(0.56) | 0.01<br>(0.97)      | -0.02<br>(0.93)       | -16.2<br>(0.99)                                 |
| <b>Distal cardioembolic</b>        | Years on antihypertensives  | -0.01<br>(0.97)        | -0.21<br>(0.11)  | -0.26<br>(0.07) | -0.25<br>(0.99)     | -0.35<br>(0.03)       | -0.05<br>(1.0)                                  |
|                                    | Mean # of antihypertensives | 0.87<br>(0.35)         | -0.46<br>(0.56)  | -0.63<br>(0.43) | -1.24<br>(0.99)     | -1.30<br>(0.18)       | -0.42<br>(0.99)                                 |
|                                    | Years on Hypoglycemics      | 0.03<br>(0.80)         | -0.04<br>(0.81)  | -0.02<br>(0.90) | 0.04<br>(1.00)      | 0.11<br>(0.53)        | -0.05<br>(0.99)                                 |
|                                    | Years on statins            | 0.08<br>(0.57)         | -0.10<br>(0.41)  | -0.12<br>(0.58) | -0.03<br>(1.00)     | -0.18<br>(0.23)       | -0.06<br>(0.99)                                 |
|                                    | Years on antiplatelets      | -0.11<br>(0.52)        | 0.21<br>(0.20)   | 0.17<br>(0.27)  | -0.01<br>(0.99)     | 0.11<br>(0.54)        | -0.13<br>(0.99)                                 |
|                                    | Years on anticoagulation    | 0.03<br>(0.80)         | -0.13<br>(0.27)  | -0.17<br>(0.16) | -0.08<br>(0.99)     | -0.26<br>(0.05)       | -12.6<br>(0.99)                                 |
| <b>Intracranial large artery</b>   | Years on antihypertensives  | -0.08<br>(0.54)        | -0.21<br>(0.14)  | -0.23<br>(0.14) | -0.16<br>(0.99)     | 0.02<br>(0.92)        | -1.41<br>(0.23)                                 |
|                                    | Mean # of antihypertensives | 0.58<br>(0.51)         | -0.20<br>(0.81)  | -0.10<br>(0.91) | -0.20<br>(0.99)     | -0.10<br>(0.94)       | 0.70<br>(0.73)                                  |
|                                    | Years on Hypoglycemics      | -0.15<br>(0.54)        | 0.13<br>(0.25)   | 0.12<br>(0.29)  | -0.03<br>(1.00)     | -0.31<br>(0.04)       | -5.53<br>(0.99)                                 |
|                                    | Years on statins            | 0.15<br>(0.27)         | -0.11<br>(0.48)  | -0.09<br>(0.58) | -0.01<br>(0.99)     | -0.03<br>(0.83)       | -0.06<br>(0.66)                                 |
|                                    | Years on antiplatelets      | 0.06<br>(0.66)         | -0.02<br>(0.88)  | -0.07<br>(0.65) | -0.12<br>(0.99)     | 0.22<br>(0.39)        | -0.35<br>(0.32)                                 |
|                                    | Years on anticoagulation    | -12.12<br>(0.99)       | 1.89<br>(0.007)  | 1.71<br>(0.05)  | 1.19<br>(0.99)      | 2.45<br>(0.03)        | 0.12<br>(0.99)                                  |
| <b>Isolated penetrating artery</b> | Years on antihypertensives  | -0.01<br>(0.98)        | -0.15<br>(0.10)  | -0.14<br>(0.15) | -0.14<br>(0.56)     | -0.52<br>(0.05)       | 0.03<br>(0.82)                                  |
|                                    | Mean # of antihypertensives | 0.39<br>(0.72)         | -0.51<br>(0.43)  | -0.66<br>(0.36) | -1.92<br>(0.38)     | -1.63<br>(0.26)       | 0.47<br>(0.60)                                  |
|                                    | Years on Hypoglycemics      | 0.31<br>(0.11)         | 0.11<br>(0.31)   | 0.19<br>(0.11)  | 0.20<br>(0.48)      | -0.01<br>(0.97)       | 0.20<br>(0.19)                                  |
|                                    | Years on statins            | 0.01<br>(0.97)         | 0.02<br>(0.87)   | 0.03<br>(0.79)  | -0.09<br>(0.80)     | -0.47<br>(0.23)       | -0.41<br>(0.07)                                 |
|                                    | Years on antiplatelets      | 0.99<br>(0.12)         | 0.09<br>(0.34)   | 0.14<br>(0.18)  | 0.09<br>(0.76)      | -0.12<br>(0.58)       | 0.36<br>(0.12)                                  |
|                                    | Years on anticoagulation    | -20.45<br>(0.98)       | -0.28<br>(0.36)  | -0.43<br>(0.43) | -19.31<br>(0.99)    | -0.30<br>(0.46)       | -16.3<br>(0.99)                                 |
